# Supplementary material for: Measuring Myeloperoxidase Activity in Biological Samples
Source: PubMed Central journal article supplement (PMC3702519; doi:10.1371/journal.pone.0067976), 2013-07-05
Supplement: pone.0067976.s001.pdf [file pone.0067976.s001.pdf]

## Supporting Information File S1

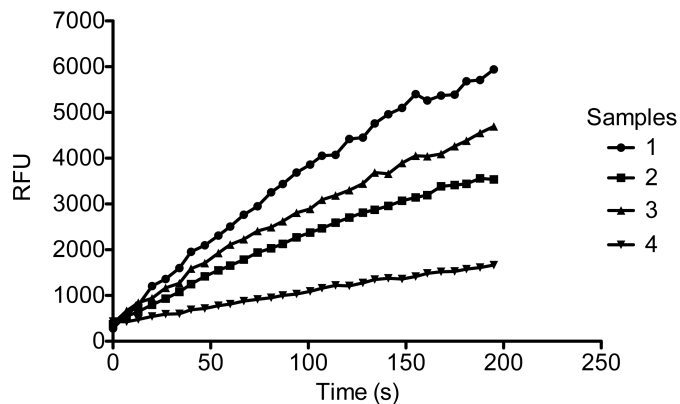

**Figure S1: Relative fluorescent units plotted over time with different samples using the antibody-capture MPO activity assay with ADHP.**

There is a near-linear increase of ADHP signal in the presence of different MPO concentrations in biological samples.

RFU=relative fluorescence units. ADHP=10-acetyl-3,7-dihydroxyphenoxazine.

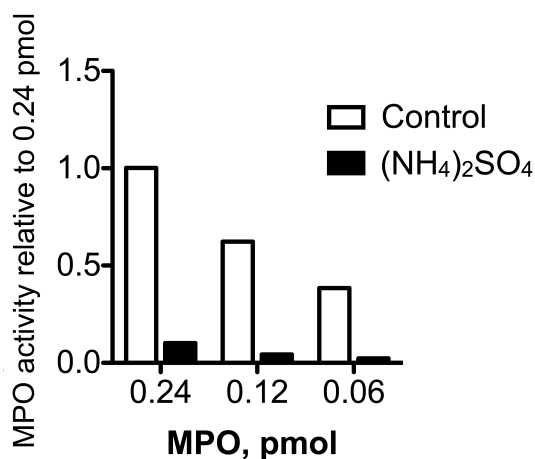

**Figure S2: Ammonium sulfate protein precipitation decreases recovery of MPO activity.**

MPO was precipitated with (NH<sub>4</sub>)<sub>2</sub>SO<sub>4</sub>, and its activity was evaluated. We found significantly decreased MPO activity with ADHP after precipitation with (NH<sub>4</sub>)<sub>2</sub>SO<sub>4</sub> compared to control.

MPO=myeloperoxidase. (NH<sub>4</sub>)<sub>2</sub>SO<sub>4</sub>=ammonium sulfate. ADHP=10-acetyl-3,7-dihydroxyphenoxazine.

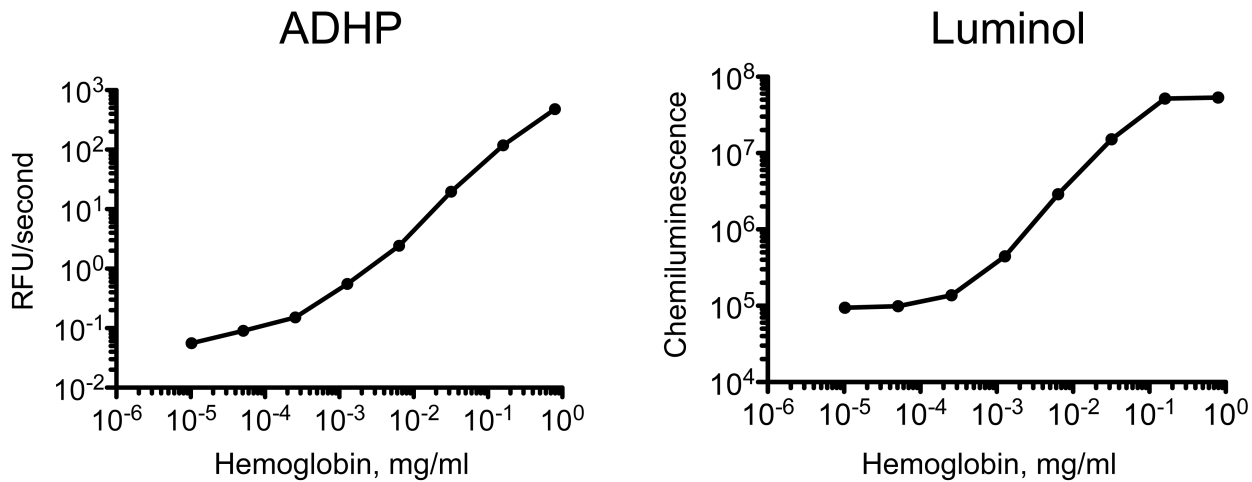

**Figure S3: ADHP and luminol assays are sensitive to unspecific peroxidase activity.**

Increasing concentrations of hemoglobin result in increasing signal in both ADHP and luminol assays. This indicates that both assays are adversely affected by nonspecific peroxidase activity. ADHP=10-acetyl-3,7-dihydroxyphenoxazine.

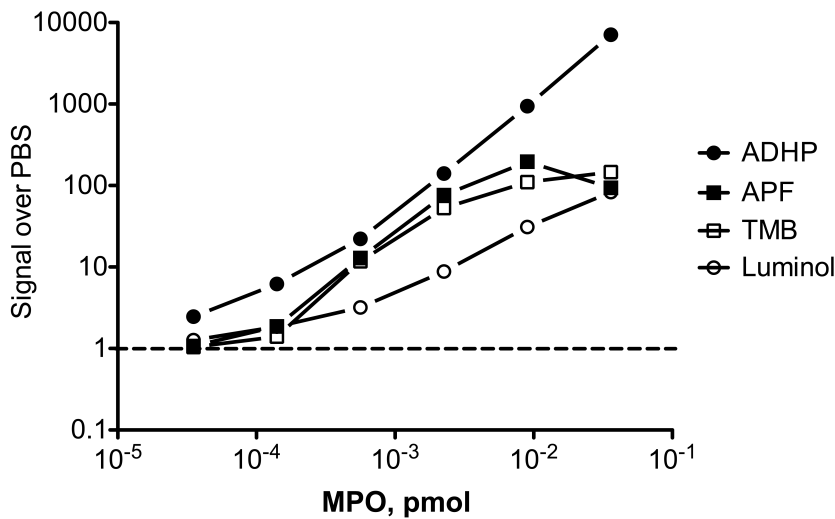

**Figure S4: ADHP is more sensitive and has a wider assay range than APF, TMB, and luminol.**

ADHP is more sensitive, yields consistently higher signal over PBS, and is more linear over the entire range of the MPO standard curve compared to APF, TMB, and luminol.

ADHP=10-acetyl-3,7-dihydroxyphenoxazine. APF=3'-(p-aminophenyl) fluorescein. HPF=3'-(p-hydroxyphenyl) fluorescein. TMB=3,3',5,5'-Tetramethylbenzidine

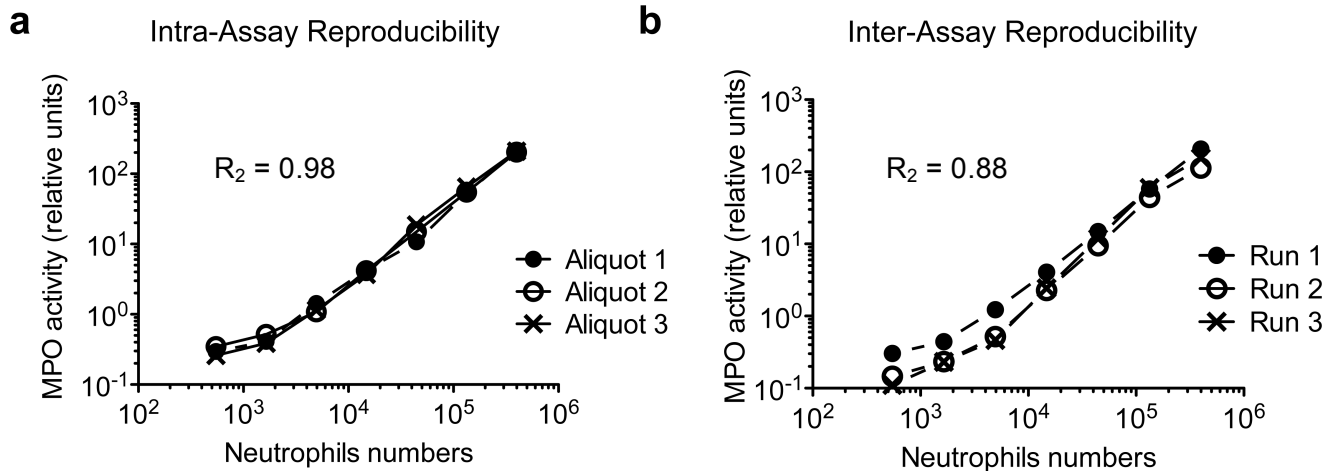

**Figure S5: Reproducibility of the MPO capture assay.**

(a) Intra-assay reproducibility was measured by assaying the same samples in triplicates (coefficient of determination  $R_2 = 0.98$ ,  $p < 0.0001$ ). (b) Inter-assay reproducibility was measured by performing the assay on the same sample loaded at different times, approximately 1 hour apart. It also shows a strong  $R_2$  value of 0.88 ( $p < 0.0001$ ).

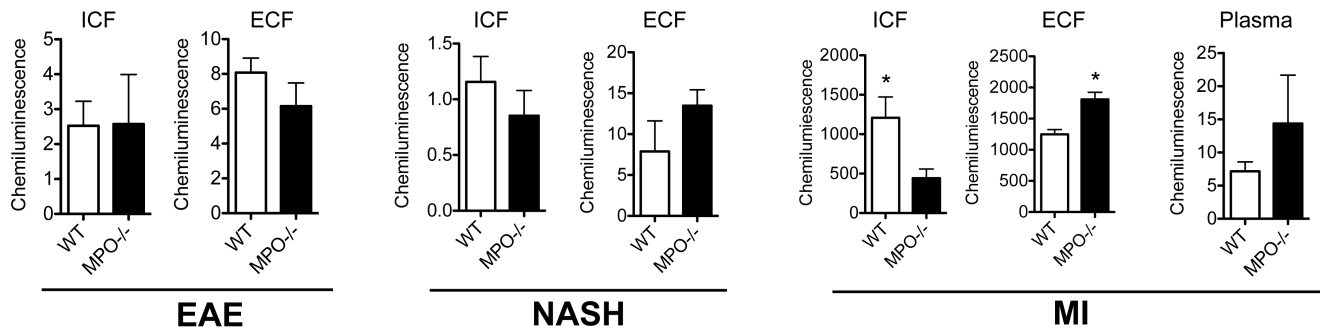

**Figure S6: Luminol is not specific for MPO activity in EAE, NASH, or MI.**

Poor specificity towards MPO is shown with bromide-dependent chemiluminescence at acidic pH with luminol. In neither EAE nor NASH nor MI could a significant difference between WT and MPO be detected with this assay ( $n=3$  per group).

MPO=myeloperoxidase. EAE=experimental autoimmune encephalomyelitis. MI=myocardial infarction.

NASH=non-alcoholic steatohepatitis. ECF=extracellular fraction. ICF=intracellular fraction. WT=wildtype C57BL/6. MPO<sup>-/-</sup>=MPO knockout. \*  $P < 0.05$ .

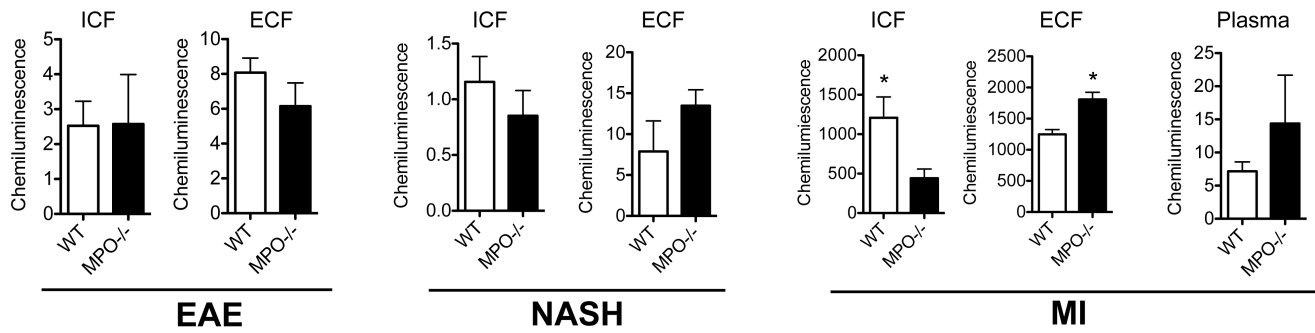

**Figure S7: APF/HPF is not specific to MPO in EAE, NASH, or MI.**

Poor specificity towards MPO is shown with chlorination detection using APF/HPF. In neither EAE nor NASH nor MI, could a significant difference between WT and MPO be detected with this assay (n=3 per group).

MPO=myeloperoxidase. EAE=experimental autoimmune encephalomyelitis. MI=myocardial infarction. NASH=non-alcoholic steatohepatitis. ECF=extracellular fraction. ICF=intracellular fraction. WT=wildtype C57BL/6. MPO<sup>-/-</sup>=MPO knockout. APF=3'-(p-aminophenyl) fluorescein. HPF=3'-(p-hydroxyphenyl) fluorescein. \*  $P < 0.05$ .
